# Supplementary material
Source: MDPI journal article supplement (https://www.mdpi.com/2297-8739/10/7/377)
Supplement: s1 [file s1]

Supplementary Figures:

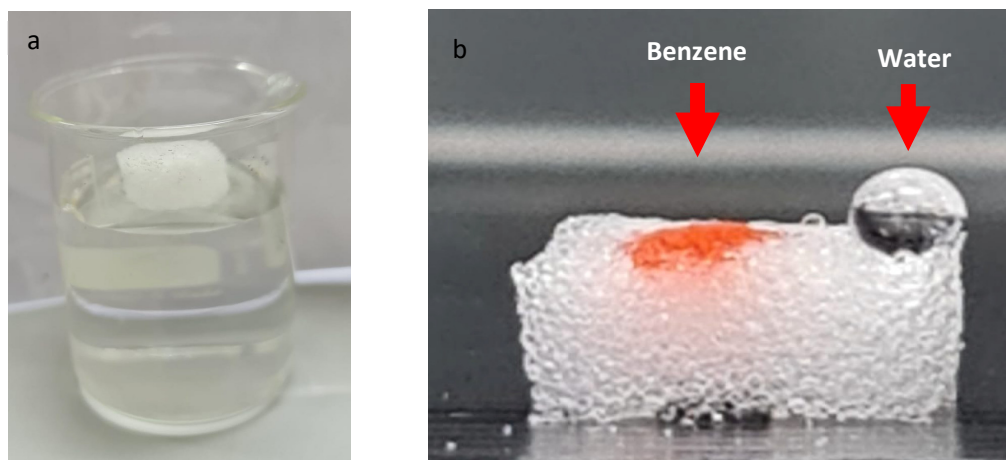

**Figure S1.** (a) The PDMS foam float on water; (b) Optical images of the wetting behaviors of water and benzene droplets on the surface of PDMS foam.

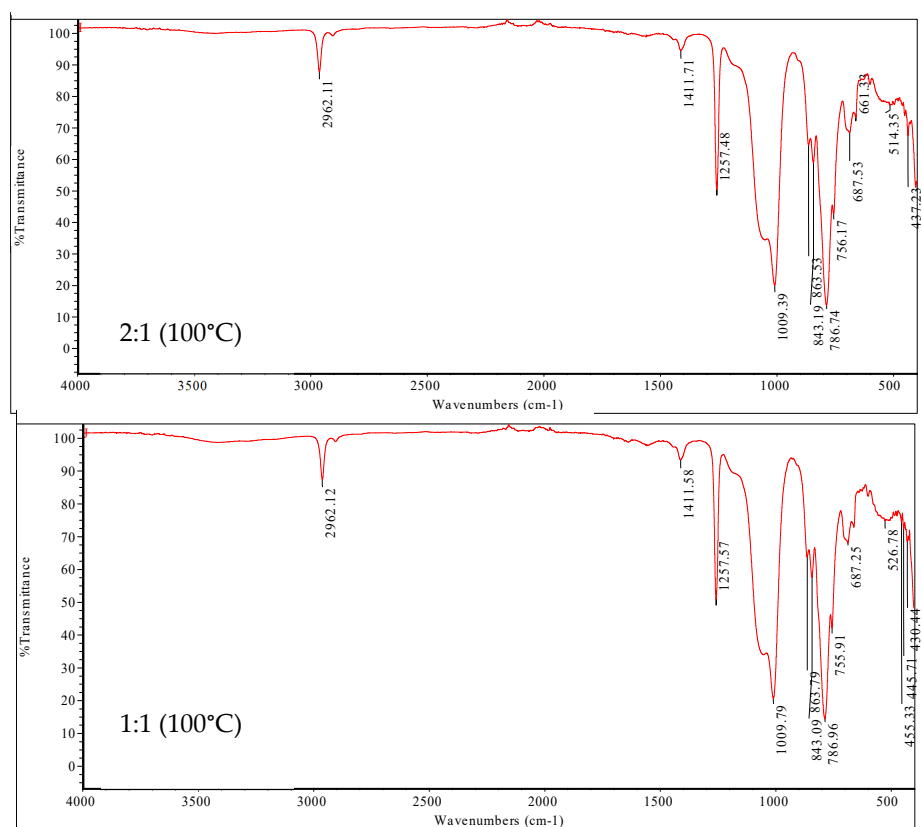

**Figure S2.** FTIR spectra of 1:1(100 °C) and 2:1(100 °C) PDMS foams.

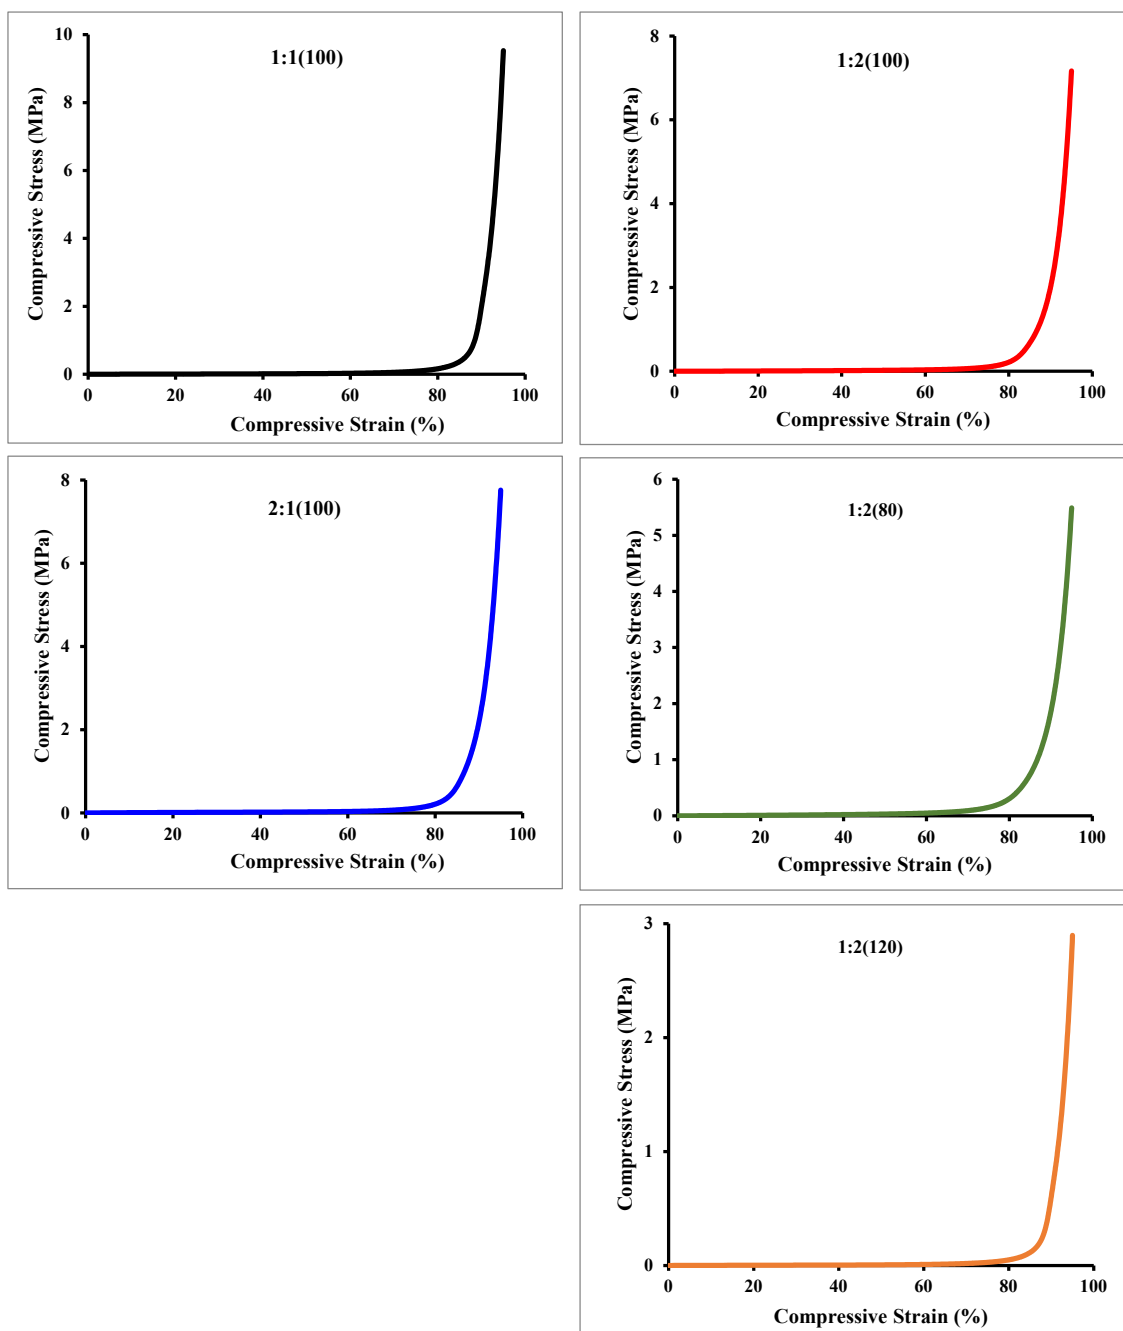

**Figure S3.** Stress-strain curves for the prepared PDMS foams at strains of 95%.

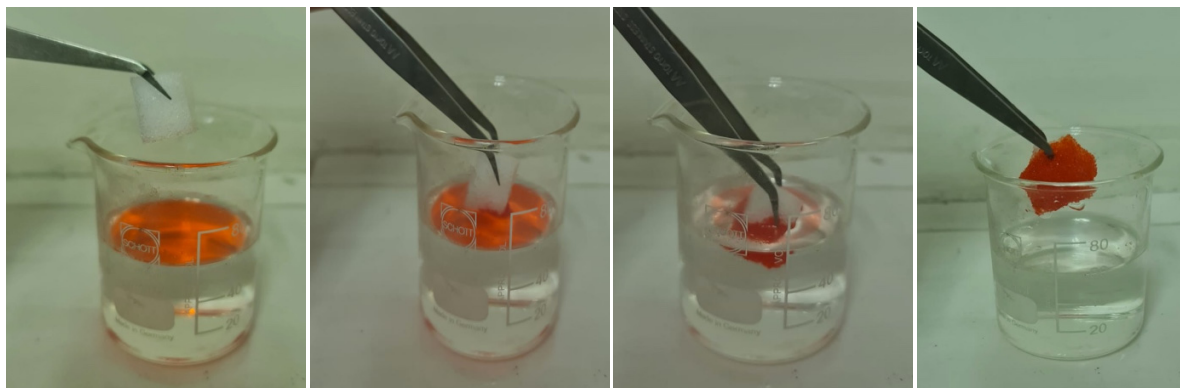

**Figure S4.** Absorption of benzene, stained with Sudan III dye, by the 1:2(100) PDMS foam.

**Table S1.** The modulus and the compressive strength of the PDMS foams.

| PDMS<br>foams | Modulus<br>(MPa)    | Compressive<br>Strength (MPa) |
|---------------|---------------------|-------------------------------|
| 1:2(80)       | $6 \times 10^{-04}$ | 0.0316                        |
| 2:1(100)      | $5 \times 10^{-04}$ | 0.0243                        |
| 1:2(100)      | $4 \times 10^{-04}$ | 0.0230                        |
| 1:1(100)      | $3 \times 10^{-04}$ | 0.0184                        |
| 1:2(120)      | $1 \times 10^{-04}$ | 0.0056                        |
